# Supplementary material for: Simple corrections for the static dielectric constant of liquid mixtures from model force fields
Source: Royal Society of Chemistry journal article supplement (doi:10.1039/d0cp04034g), 2020-01-01
Supplement: d0cp04034g1.pdf [file d0cp04034g1.pdf]

Supporting Information:  
Simple corrections for the static dielectric  
constant of liquid mixtures from model force  
fields

Javier Cardona,<sup>\*,†,‡</sup> Miguel Jorge,<sup>†</sup> and Leo Lue<sup>†</sup>

<sup>†</sup>*Department of Chemical and Process Engineering, University of Strathclyde, James Weir  
Building, 75 Montrose Street, Glasgow G1 1XJ, United Kingdom*

<sup>‡</sup>*Department of Electronic and Electrical Engineering, University of Strathclyde, Royal  
College Building, 204 George Street, Glasgow G1 1XW, United Kingdom*

E-mail: [j.cardona-amengual@strath.ac.uk](mailto:j.cardona-amengual@strath.ac.uk)

# 1 Static dielectric constant

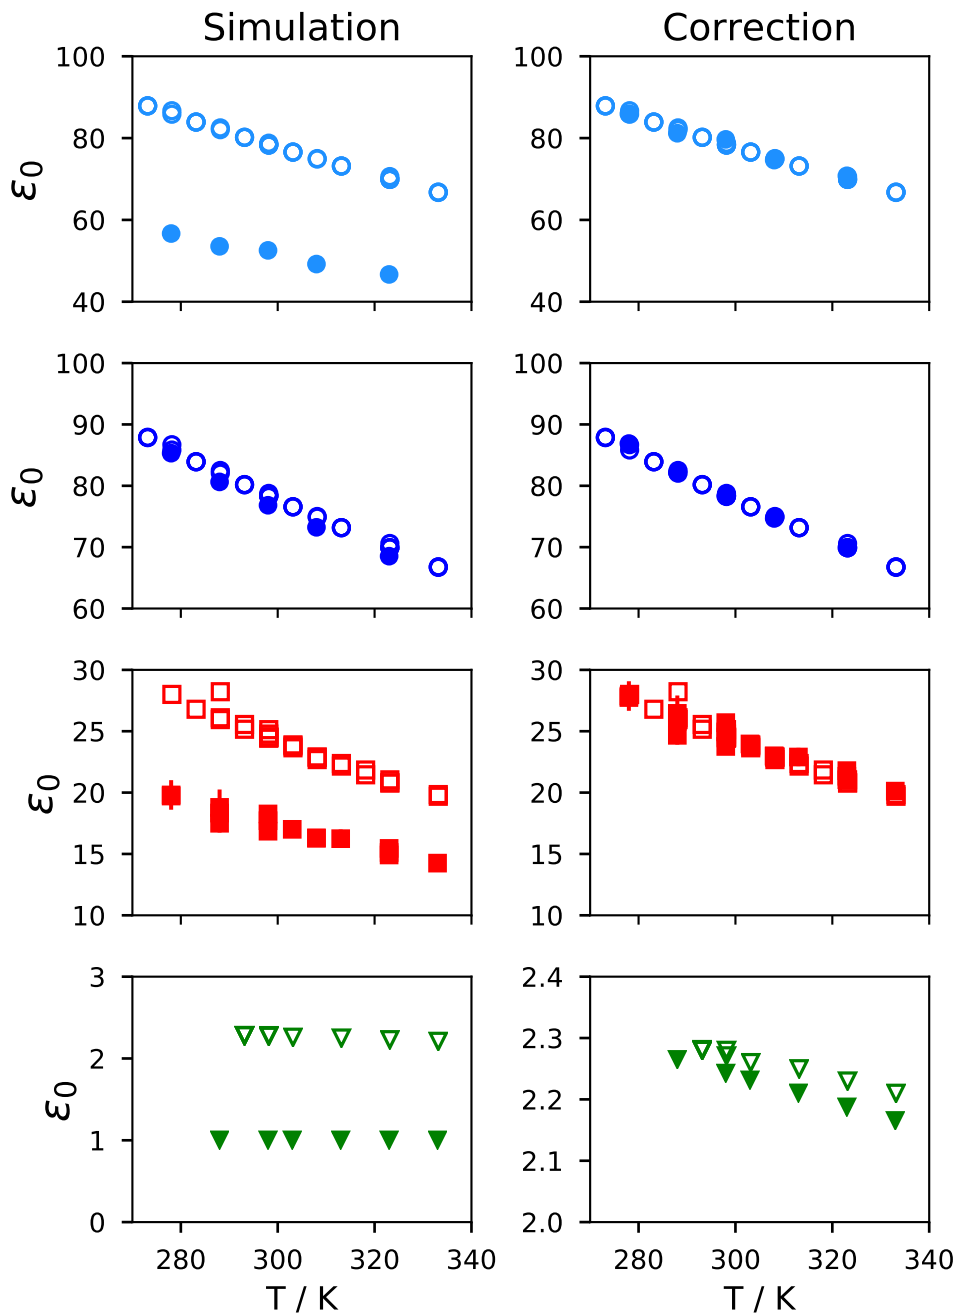

Figure S1: Influence of temperature on the static dielectric constant  $\epsilon_0$  of water (TIP4P, light blue), water (SPC-Fw, dark blue), ethanol (TraPPE-UA, red) and benzene (TraPPE-EH, green) at 1 bar. Filled symbols represent results obtained in our original simulations (left) and after applying the proposed correction scheme (right). Open symbols correspond to experimental measurements from different sources for water,<sup>S1-S6</sup> ethanol,<sup>S1,S5-S10</sup> and benzene.<sup>S6,S11-S14</sup>

## 2 Dipole moment distributions

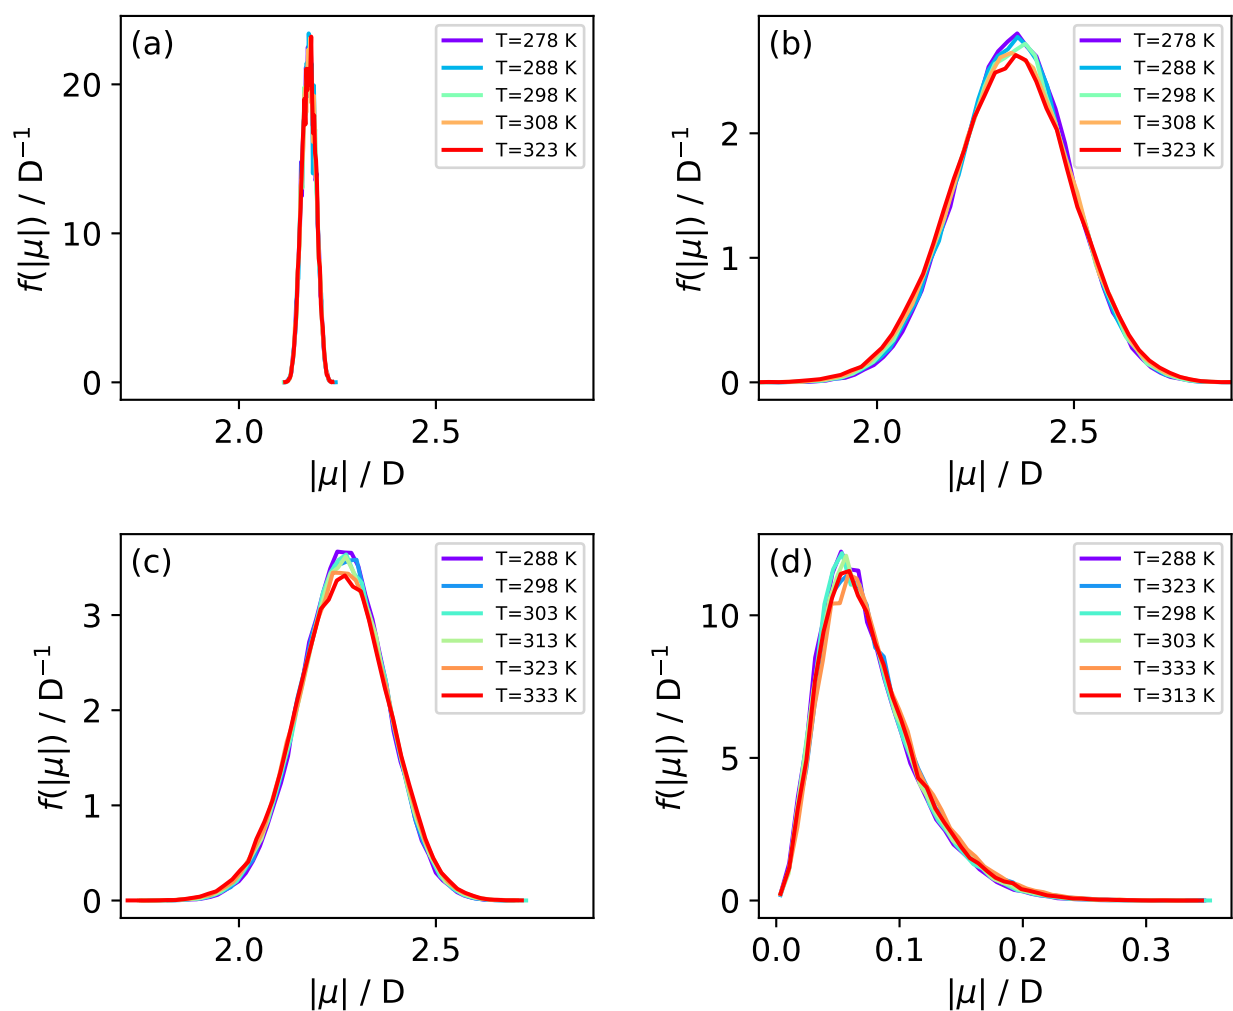

Figure S2: Influence of temperature on the dipole moment distribution of (a) water TIP4P, (b) water SPC-Fw, (c) ethanol TraPPE-UA and (d) benzene TraPPE-EH at 1 bar.

### 3 Temperature dependence of simulated static dielectric constant and infinite frequency dielectric constant

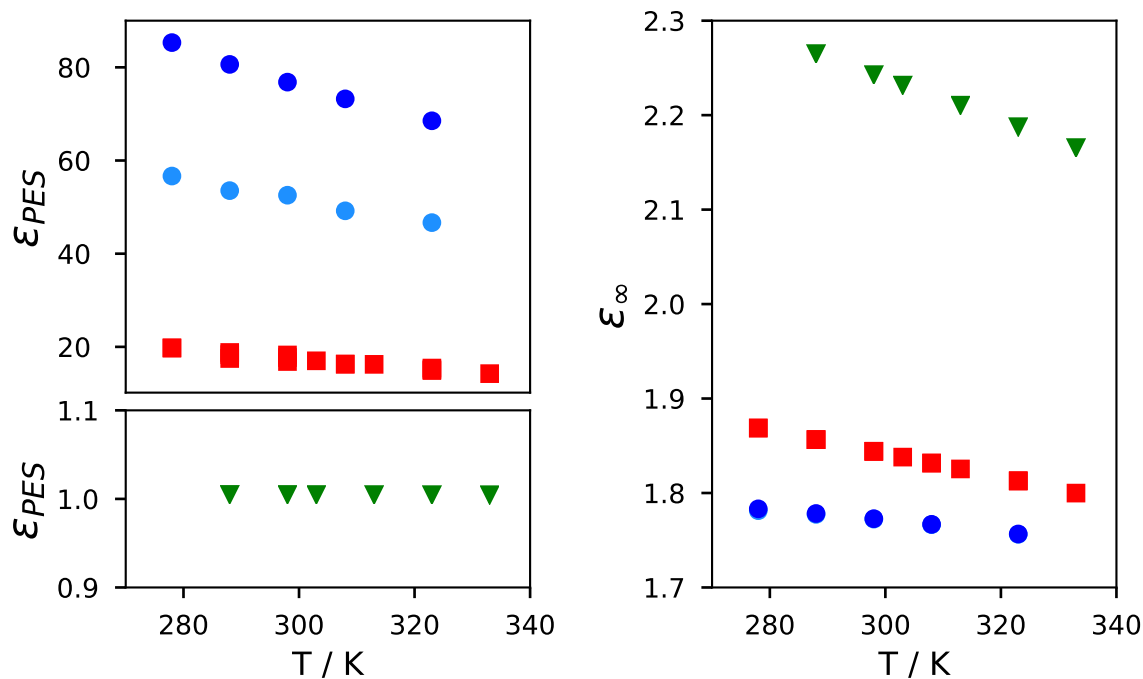

Figure S3: Influence of temperature on the simulated static dielectric constant  $\epsilon_{PES}$  (left) and infinite frequency dielectric constant  $\epsilon_\infty$  (right) of water (TIP4P, light blue), water (SPC-Fw, dark blue), ethanol (TraPPE-UA, red) and benzene (TraPPE-EH, green) at 1 bar. The data points corresponding to water TIP4P and SPC-Fw for  $\epsilon_\infty$  overlap and only the latter are visible on the figure.

## 4 Density

### 4.1 Single components

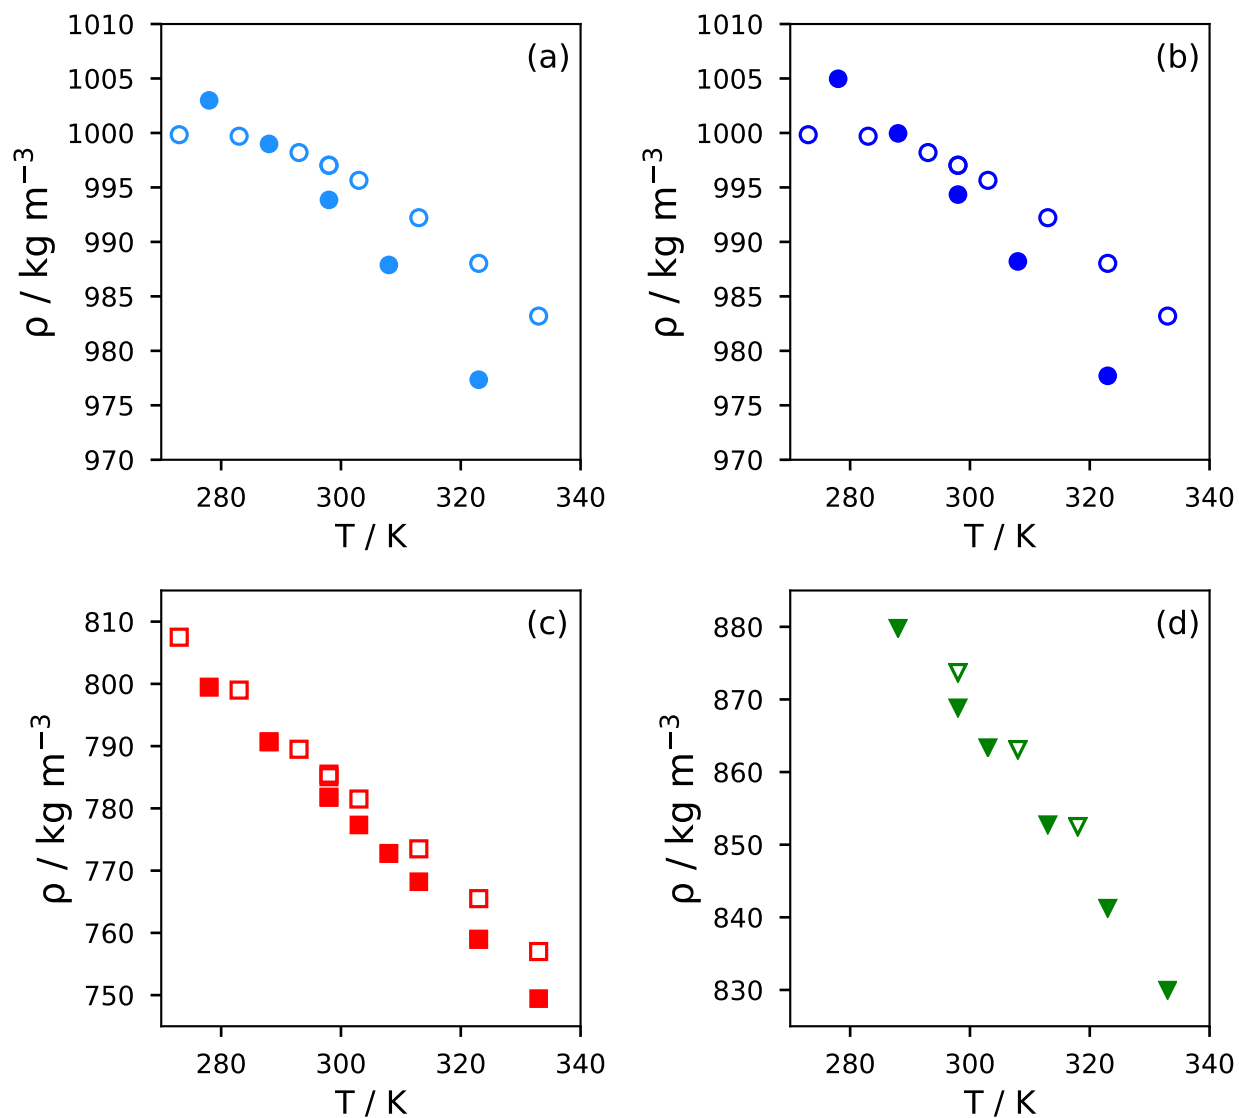

Figure S4: Influence of temperature on the density of (a) water TIP4P, (b) water SPC-Fw, (c) ethanol TraPPE-UA and (d) benzene TraPPE-EH at 1 bar. Filled symbols represent results obtained in our simulations. Open symbols correspond to experimental measurements for water,<sup>S9,S15</sup> ethanol,<sup>S9,S15</sup> and benzene.<sup>S16</sup>

## 4.2 Mixtures

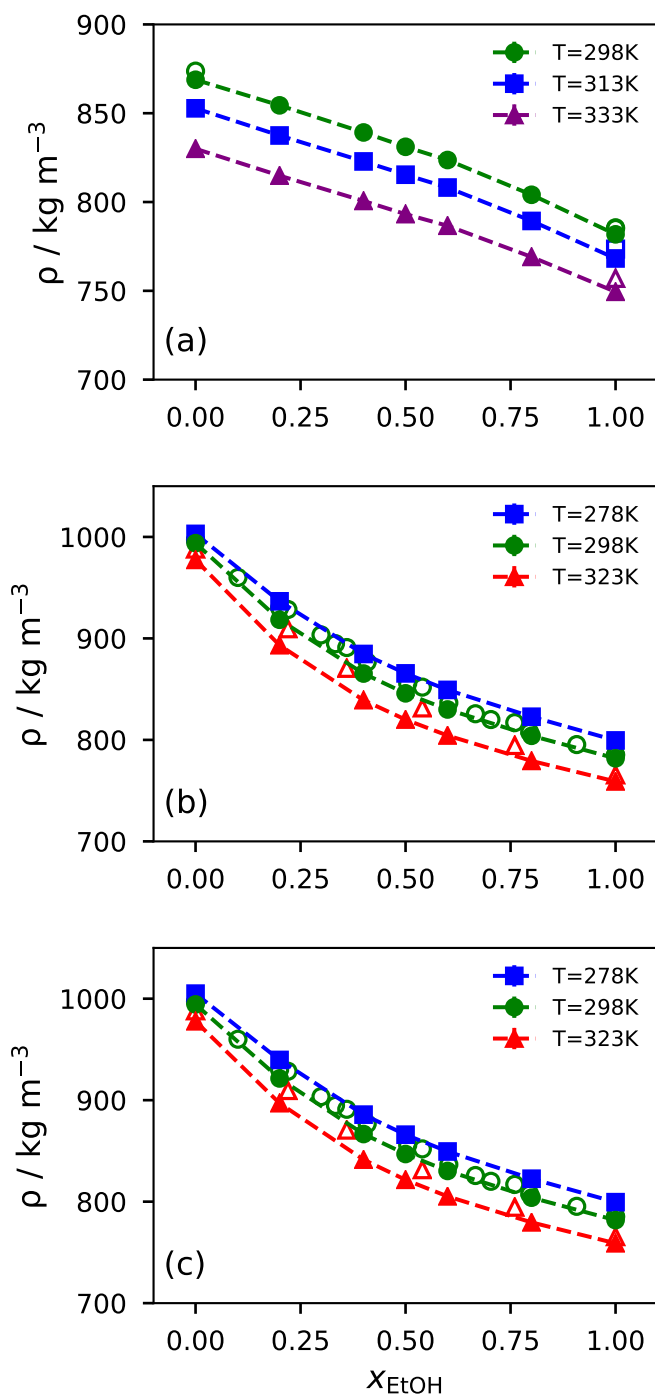

Figure S5: Influence of temperature on the density of (a) ethanol-benzene, (b) ethanol-water TIP4P, and (c) ethanol-water SPC-Fw mixtures at 1 bar. Filled symbols represent results obtained in our simulations. Open symbols correspond to experimental measurements for ethanol-benzene<sup>S9,S15,S16</sup> and ethanol-water<sup>S9,S15</sup> mixtures.

## References

- (S1) Buck, D. E. The dielectric spectra of ethanol-water mixtures in the microwave region. Ph.D. thesis, Massachusetts Institute of Technology. Dept. of Chemistry., 1965.
- (S2) Kienitz, H.; Marsh, K. N. Recommended reference materials for realization of physicochemical properties. Section: Permittivity. *Pure Appl. Chem.* **1981**, *53*, 1847–1862.
- (S3) Kaatze, U. Complex permittivity of water as a function of frequency and temperature. *J. Chem. Eng. Data* **1989**, *34*, 371–374.
- (S4) Ellison, W.; Lamkaouchi, K.; Moreau, J.-M. Water: a dielectric reference. *J. Mol. Liq.* **1996**, *68*, 171–279.
- (S5) Sato, T.; Buchner, R. Dielectric Relaxation Processes in Ethanol/Water Mixtures. *J. Phys. Chem. A* **2004**, *108*, 5007–5015.
- (S6) Sengwa, R.; Madhvi,; Sankhla, S.; Sharma, S. Characterization of Heterogeneous Interaction Behavior in Ternary Mixtures by a Dielectric Analysis: Equi-Molar H-bonded Binary Polar Mixtures in Aqueous Solutions. *J. Solution Chem.* **2006**, *35*, 1037–1055.
- (S7) Dannhauser, W.; Bahe, L. W. Dielectric Constant of Hydrogen Bonded Liquids. III. Superheated Alcohols. *J. Chem. Phys.* **1964**, *40*, 3058–3066.
- (S8) Khimenko, M.; Aleksandrov, V.; Gritsenko, N. An Experimental Study of the Dielectric Constant of the Ethanol - Benzene Binary System along the Saturation Line from 20 to 240 °C. *Russ. J. Phys. Chem.* **1973**, *47*, 2914–2915.
- (S9) Petong, P.; Pottel, R.; Kaatze, U. Water-Ethanol Mixtures at Different Compositions and Temperatures. A Dielectric Relaxation Study. *J. Phys. Chem. A* **2000**, *104*, 7420–7428.

- (S10) Gregory, A.; Clarke, R. N. *Tables of the complex permittivity of dielectric reference liquids at frequencies up to 5 GHz*; NPL Report MAT 23, 2012.
- (S11) King, J. F.; Patrick, W. A. The measurement of dielectric constants. *J. Am. Chem. Soc.* **1921**, *43*, 1835–1843.
- (S12) Goss, F. R. 173. The magnitude of the solvent effect in dipole-moment measurements. Part III. Polarisation and association of alcohols in the liquid phase. *J. Chem. Soc.* **1940**, *0*, 888–894.
- (S13) Fridman, B. M. An Experimental Study of the Dielectric Constant of the Ethanol - Benzene Binary System along the Saturation Line from 20 to 240 °C. *Russ. J. Phys. Chem.* **1975**, *49*, 1423–1424.
- (S14) Starobinets, G.; Starobinets, K.; Ryzhikova, L. Adsorption Layers and Dielectric Polarization of Fatty Alcohol - Benzene Solutions. *Zh. Fiz. Khim.* **1951**, *25*, 1186–1197.
- (S15) Herráez, J.; Belda, R. Refractive Indices, Densities and Excess Molar Volumes of Monoalcohols + Water. *J. Solution Chem.* **2006**, *35*, 1315–1328.
- (S16) Deshpande, D.; Bhatgadde, L. Heat capacities at constant volume, free volumes, and rotational freedom in some liquids. *Aust. J. Chem.* **1971**, *24*, 1817–1822.
